# Supplementary material for: Healthy lifestyle behaviors and persistent socioeconomic inequalities in health-related quality of life: Evidence from a population-based study in Turkey
Source: Research Square preprint supplement (doi:10.21203/rs.3.rs-8336519/v1), 2025-12-19
Supplement: Supplementary file 1 [file 2f1224ec921b0eb37b3952e2.docx]

**Appendix Table S1.** Sensitivity analysis: Survey-weighted linear regression of EQ-5D index on healthy lifestyle behaviors and household income

| **Variable** | **β** | **SE** | **t** | **p** | **95% CI** |
| --- | --- | --- | --- | --- | --- |
| No Excessive Alcohol | 0.002 | 0.011 | 0.16 | 0.873 | [−0.019 – 0.022] |
| Healthy BMI | 0.012 | 0.004 | 3.14 | 0.002 | [0.005 – 0.019] |
| Healthy Diet | 0.072 | 0.004 | 17.62 | <0.001 | [0.064 – 0.080] |
| No Smoking | 0.033 | 0.004 | 7.79 | <0.001 | [0.025 – 0.041] |
| Physical activity | −0.000 | 0.007 | −0.05 | 0.961 | [−0.014 – 0.014] |
| Household income: High | 0.044 | 0.014 | 3.08 | 0.002 | [0.016 – 0.072] |
| Alcohol × High income | 0.007 | 0.014 | 0.49 | 0.626 | [−0.020 – 0.034] |
| BMI × High income | −0.007 | 0.005 | −1.41 | 0.157 | [−0.018 – 0.003] |
| Diet × High income | −0.020 | 0.006 | −3.32 | 0.001 | [−0.031 – −0.008] |
| Smoke × High income | 0.008 | 0.006 | 1.38 | 0.169 | [−0.003 – 0.019] |
| Sport × High income | −0.009 | 0.009 | −0.97 | 0.333 | [−0.026 – 0.009] |
| Age | −0.004 | 0.000 | −36.93 | <0.001 | [−0.004 – −0.004] |
| Female | −0.114 | 0.003 | −41.60 | <0.001 | [−0.120 – −0.109] |
| Education (ref < Primary) | | | | | |
| Primary | 0.131 | 0.006 | 22.68 | <0.001 | [0.119 – 0.142] |
| Secondary | 0.158 | 0.006 | 25.19 | <0.001 | [0.145 – 0.170] |
| Tertiary | 0.175 | 0.007 | 26.76 | <0.001 | [0.162 – 0.188] |
| Married | 0.040 | 0.003 | 12.73 | <0.001 | [0.034 – 0.046] |
| Chronic conditions | −0.121 | 0.002 | −68.64 | <0.001 | [−0.125 – −0.118] |
| Constant | 0.712 | 0.013 | 53.88 | <0.001 | [0.686 – 0.737] |

Model statistics: F(18, 35,109) = 1421.04, Prob > F = 0.0000, R² = 0.3373, N = 61 362.

**Notes.** Reference groups: low income, male, no formal education, single/widowed/divorced.
